# Supplementary material
Source: Elsevier journal article supplement (https://www.sciencedirect.com/science/article/pii/S2238785419308245)
Supplement: mmc1 [file S2238785419308245:mmc1.doc]

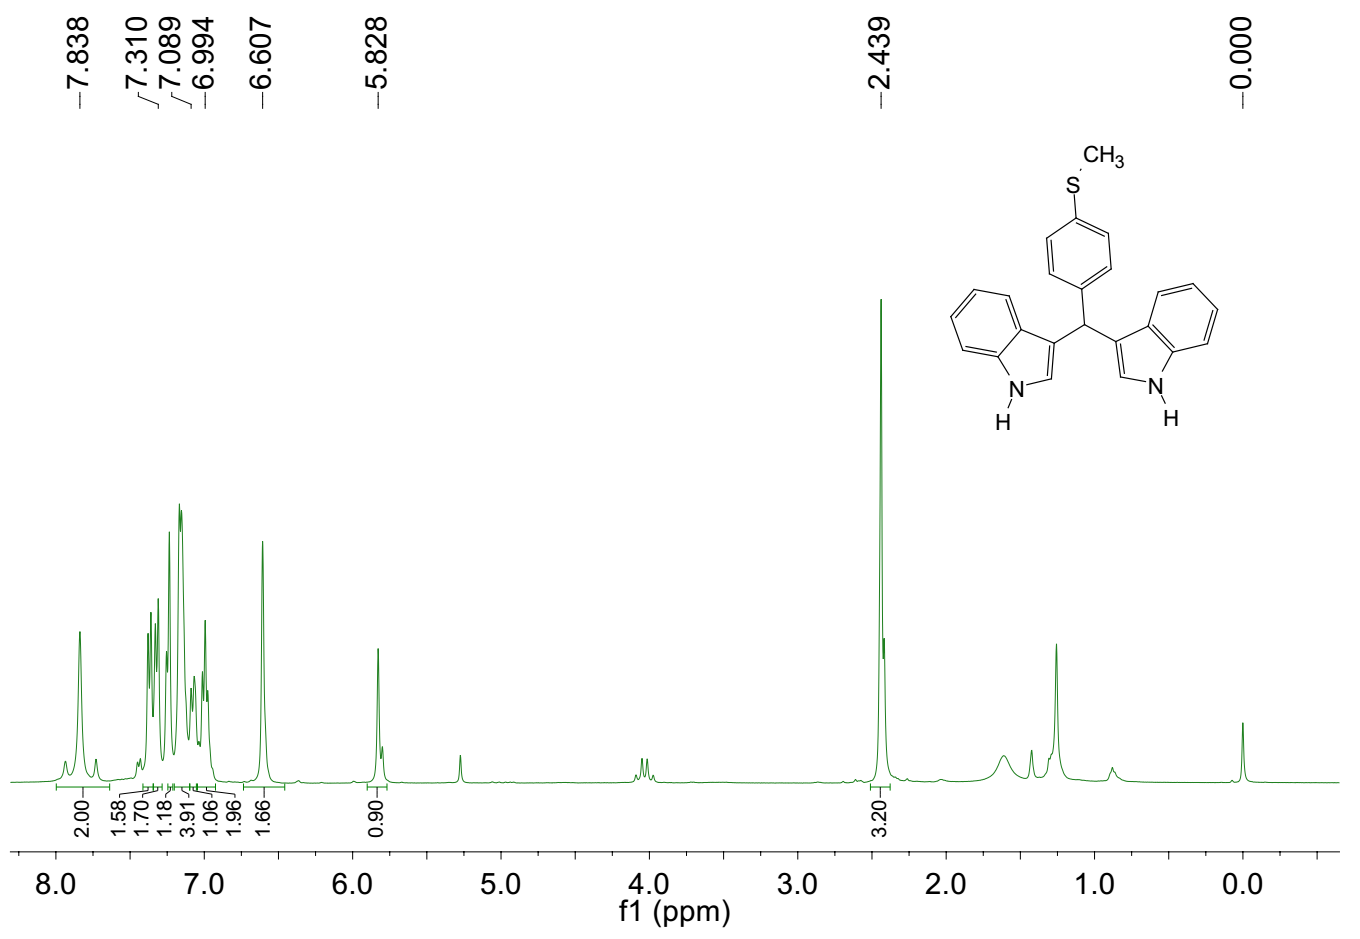


**Figure S1** The 1H-NMR spectrum of the TPBI.


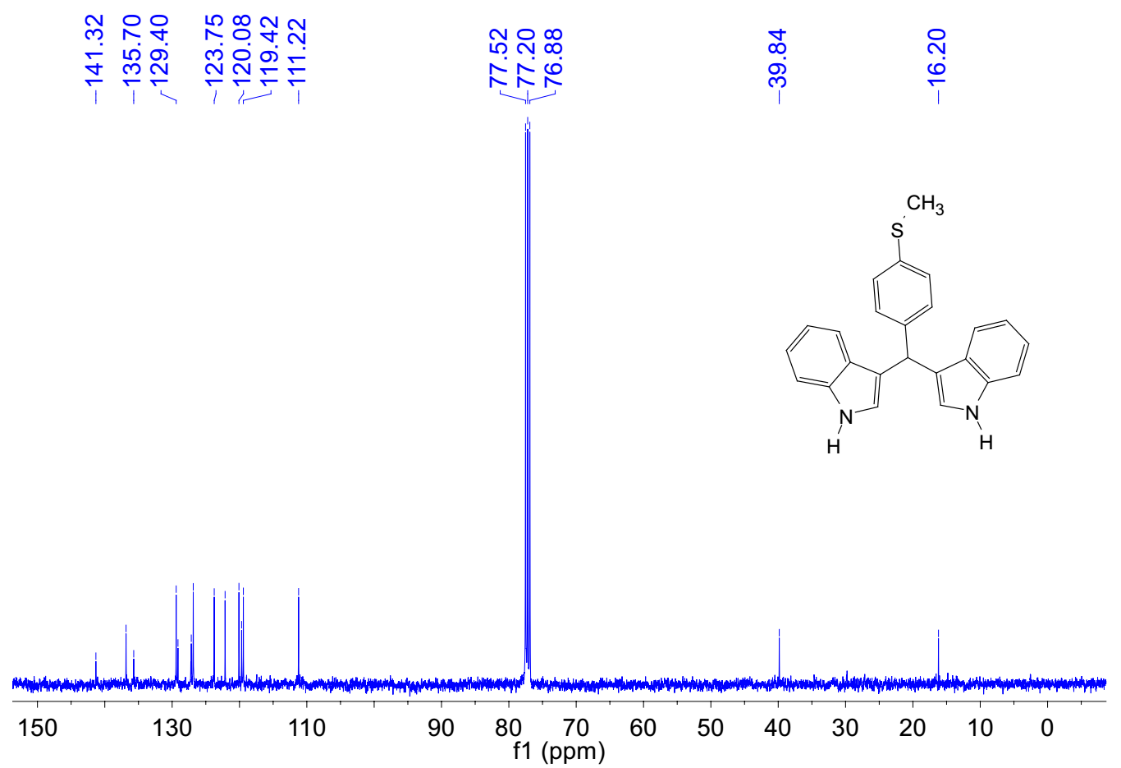


**Figure S2** The 13CNMR spectrum of the TPBI.

3,3'-((4-(Methylthio)phenyl)methylene)bis(1H-indole). 1H-NMR (400 MHz, CDCl3) δ 7.838 (s, 2H), 7.379-7.360 (d, *J* = 7.6 Hz, 2H), 7.330-7.310 (d, *J* = 8.0 Hz, 2H),7.235 (s, 1H), 7.168-7.154 (d, *J* = 5.6 Hz, 4H), 7.089-7.068 (d, *J* = 8.4 Hz, 1H), 7.036– 6.977 (m, 2H), 6.607 (s, 2H), 5.828 (s, 1H), 2.439 (s, 3H). 13C-NMR (101 MHz, CDCl3) δ 141.32, 136.84, 135.70, 129.40, 129.13, 127.16, 126.86, 123.75, 122.14, 120.08, 119.69, 119.42, 111.22, 39.84, 16.20.

**Table S1**

Polarization curves parameters obtained from the copper specimens measured in 0.5 M H2SO4 solution after immersion in 10 mM inhibitor solutions for various self-assembly time.

| Samples | *t* (h) | *j*corr (μA/cm2) | *E*corr (V/SCE) | *-β*c (mV/dec) | *β*a (mV/dec) | *η*p (%) |
| --- | --- | --- | --- | --- | --- | --- |
| Blank | - | 14.43 | -0.031 | 524.1 | 41.5 | - |
| ID | 1 | 6.53 | -0.036 | 347.5 | 43.7 | 54.75 |
|  | 4 | 3.92 | -0.063 | 221.4 | 45.1 | 72.83 |
|  | 8 | 3.02 | -0.064 | 215.4 | 47.2 | 79.07 |
|  | 12 | 1.81 | -0.079 | 197.2 | 68.2 | 87.46 |
| TPBI | 1 | 1.21 | -0.077 | 199.8 | 51.8 | 91.61 |
|  | 4 | 0.37 | -0.086 | 179.1 | 74.5 | 97.44 |
|  | 8 | 0.21 | -0.097 | 163.1 | 42.9 | 98.54 |
|  | 12 | 0.10 | -0.104 | 152.9 | 47.6 | 99.31 |

**Table S2**

Impedance parameters calculated from the EIS measurements for the copper specimens measured in 0.5 M H2SO4 solution after immersion in 10 mM inhibitor solutions for various assembly time.

| Samples | t  (h) | *R*s  (Ω·cm2) | *R*f  (Ω·cm2) | *R*ct  (kΩ·cm2) | CPEf (μf/cm2) | *n*1 | CPEdl  (μf/cm2) | *n*2 | *W*× 10-3  (/cm2) | *η*E (%) |
| --- | --- | --- | --- | --- | --- | --- | --- | --- | --- | --- |
| Blank | - | 0.84 | 9.3 | 0.38 | 31.25 | 1 | 224.7 | 0.7 | 12.32 | - |
| ID | 1 | 0.46 | 33.7 | 0.86 | 6.79 | 1 | 54.3 | 0.7 | 4.59 | 55.85 |
|  | 4 | 0.70 | 118.9 | 1.30 | 7.70 | 1 | 41.8 | 0.6 | 4.12 | 70.81 |
|  | 8 | 0.53 | 136.9 | 1.83 | 6.35 | 1 | 36.3 | 0.6 | 2.82 | 79.33 |
|  | 12 | 0.55 | 114.8 | 2.71 | 4.54 | 1 | 29.8 | 0.6 | 2.27 | 86.06 |
| TPBI | 1 | 0.76 | 112.6 | 5.38 | 11.04 | 1 | 67.5 | 0.6 | - | 92.96 |
|  | 4 | 1.09 | 123.6 | 18.47 | 11.85 | 1 | 12.2 | 0.6 | - | 97.95 |
|  | 8 | 2.09 | 249.3 | 29.49 | 1.67 | 1 | 6.8 | 0.6 | - | 98.72 |
|  | 12 | 1.75 | 305.3 | 42.08 | 1.46 | 1 | 4.4 | 0.7 | - | 99.10 |

**Table S3**

Polarization curves parameters obtained from the investigated copper samples measured in 0.5 M H2SO4 after immersion in different concentration solutions of TPBI for 12 h.

| Samples | *c*  (mM) | *j*corr  (μA/cm2) | *E*corr  (V/SCE) | *β*c  (mV/dec) | *β*a  (mV/dec) | *η*P(%) |
| --- | --- | --- | --- | --- | --- | --- |
| Blank | - | 14.43 | -0.031 | 524.1 | 41.5 | - |
| TPBI | 1 | 1.48 | -0.073 | 204.0 | 76.2 | 89.76 |
|  | 3 | 0.57 | -0.078 | 178.8 | 42.3 | 96.05 |
|  | 6 | 0.24 | -0.088 | 172.6 | 59.1 | 98.37 |
|  | 10 | 0.10 | -0.104 | 152.9 | 47.6 | 99.31 |
|  | 12 | 0.14 | -0.090 | 149.3 | 35.1 | 99.03 |

**Table S4**

Impedance parameters calculated from the EIS measurements for the investigated copper samples measured in 0.5 M H2SO4 solution after immersion different concentration solutions of TPBI for 12 h.

| Samples | C  (mM) | *R*s  (Ω·cm2) | *R*f  (Ω·cm2) | *R*ct  (kΩ·cm2) | CPEf (μf/cm2) | *n*1 | CPEdl  (μf/cm2) | *n*2 | *W* × 10-3  (/cm2) | *η*E (%) |
| --- | --- | --- | --- | --- | --- | --- | --- | --- | --- | --- |
| Blank | - | 0.84 | 9.3 | 0.38 | 31.25 | 1 | 224.7 | 0.7 | 12.32 | - |
| TPBI | 1 | 1.65 | 46.8 | 2.71 | 6.22 | 1 | 56.5 | 0.7 | - | 86.05 |
|  | 3 | 0.69 | 92.2 | 15.53 | 1.81 | 1 | 23.4 | 0.5 | - | 97.56 |
|  | 6 | 0.95 | 113.5 | 22.52 | 1.02 | 1 | 7.4 | 0.7 | - | 98.32 |
|  | 10 | 1.75 | 305.3 | 42.08 | 1.46 | 1 | 4.4 | 0.7 | - | 99.10 |
|  | 12 | 1.00 | 243.1 | 27.75 | 1.61 | 1 | 12.4 | 0.4 | - | 98.63 |

**Table S5**

De-convolution parameters including chemical states, binding energies, and FWHMs of C1s XPS spectra peaks obtained from surfaces of the studied bare copper specimen and copper specimen adsorbed by TPBI.

| Samples | Chemical states | Binding energy (eV) | FWHM |
| --- | --- | --- | --- |
| Blank | C−C | 284.82 | 1.20 |
| C−O | 286.20 | 1.15 |
| O−C=O | 288.35 | 1.20 |
| Cu-TPBI | C−C/C=C | 284.72 | 1.23 |
| C−S | 285.53 | 1.24 |
| C−O | 286.86 | 1.23 |
| C−N/O−C=O | 288.40 | 1.25 |

**Table S6**

De-convolution parameters including chemical states, binding energies, FWHMs of N1s XPS spectra peaks obtained from surface of the studied adsorbed by TPBI.

| Sample | Chemical states | Binding energy (eV) | FWHM |
| --- | --- | --- | --- |
| Cu-TPBI | N−Cu | 399.09 | 1.51 |
| N-H | 400.38 | 1.59 |

**Table S7**

De-convolution parameters including chemical states, binding energies, FWHMs of S2p XPS spectra peaks obtained from surfaces of the studied bare copper specimen and copper specimen adsorbed by TPBI.

| Sample | Chemical states | Binding energy (eV) | FWHM |
| --- | --- | --- | --- |
| Cu-TPBI | S-Cu2p3/2 | 163.20 | 1.15 |
| S-Cu2p1/2 | 164.39 | 1.18 |

**Table S8**

Thermodynamic parameters for the adsorption of TPBIin 0.5 M H2SO4 solution at 298 K.

| Sample | Methods | | *K* (103 L/mol) | | ∆*G*0 (kJ/mol) |
| --- | --- | --- | --- | --- | --- |
| TPBI |  | Polarization | | 7.76 | -32.14 |

**Table S9**

Quantum chemical parameters of ID and TPBI.

| Samples | *E*HOMO (eV) | *E*LOMO (eV) | ∆*E* (eV) | *µ* (Debye) |
| --- | --- | --- | --- | --- |
| ID | -0.1737 | -0.0322 | 0.1415 | 2.133 |
| TPBI | -0.1645 | -0.0376 | 0.1269 | 2.773 |
